# Supplementary material for: Nucleophilic behaviour of dioxo- and thiooxophosphorane complexes [MoCp(CO)2{E,P-EP(O)(2,4,6-C6H2tBu3)}]−(E = O, S)
Source: Royal Society of Chemistry journal article supplement (doi:10.1039/c4dt01942c), 2014-09-19

## Electronic Supplementary Information

### Nucleophilic Behaviour of Dioxo- and Thiooxophosphorane Complexes

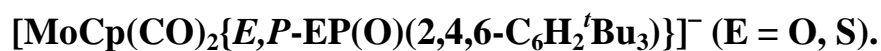

M. Alonso, M. Angeles Alvarez, M. Esther García, Daniel García-Vivó,\* and  
Miguel A. Ruiz\*.

## Computational Details

All DFT calculations were carried out using the GAUSSIAN03 package,<sup>1</sup> in which the hybrid method B3LYP was used with the Becke three-parameter exchange functional,<sup>2</sup> and the Lee-Yang-Parr correlation functional.<sup>3</sup> An accurate numerical integration grid (99,590) was used for all the calculations *via* the keyword Int=Ultrafine. Effective core potentials and their associated double- $\zeta$  LANL2DZ basis set were used for the metal atoms.<sup>4</sup> The light elements (P, O, S, C and H) were described with the 6-31G\* basis.<sup>5</sup> Geometry optimizations were performed under no symmetry restrictions, using initial coordinates derived from the X-ray data of compounds **5** and **6**, and frequency analysis were performed to ensure that a minimum structure with no imaginary frequencies was achieved in each case. Molecular orbitals and vibrational modes were visualized using the MOLEKEL program.<sup>6</sup> The topological analysis of the electron density was carried out with the *Xaim* routine.<sup>7</sup>

- (1) Gaussian 03, Revision B.02, Frisch, M. J.; Trucks, G. W.; Schlegel, H. B.; Scuseria, G. E.; Robb, M. A.; Cheeseman, J. R.; Montgomery, Jr., J. A.; Vreven, T.; Kudin, K. N.; Burant, J. C.; Millam, J. M.; Iyengar, S. S.; Tomasi, J.; Barone, V.; Mennucci, B.; Cossi, M.; Scalmani, G.; Rega, N.; Petersson, G. A.; Nakatsuji, H.; Hada, M.; Ehara, M.; Toyota, K.; Fukuda, R.; Hasegawa, J.; Ishida, M.; Nakajima, T.; Honda, Y.; Kitao, O.; Nakai, H.; Klene, M.; Li, X.; Knox, J. E.; Hratchian, H. P.; Cross, J. B.; Bakken, V.; Adamo, C.; Jaramillo, J.; Gomperts, R.; Stratmann, R. E.; Yazyev, O.; Austin, A. J.; Cammi, R.; Pomelli, C.; Ochterski, J. W.; Ayala, P. Y.; Morokuma, K.; Voth, G. A.; Salvador, P.; Dannenberg, J. J.; Zakrzewski, V. G.; Dapprich, S.; Daniels, A. D.; Strain, M. C.; Farkas, O.; Malick, D. K.; Rabuck, A. D.; Raghavachari, K.; Foresman, J. B.; Ortiz, J. V.; Cui, Q.; Baboul, A. G.; Clifford, S.; Cioslowski, J.; Stefanov, B. B.; Liu, G.; Liashenko, A.; Piskorz, P.; Komaromi, I.; Martin, R. L.; Fox, D. J.; Keith, T.; Al-Laham, M. A.; Peng, C. Y.; Nanayakkara, A.; Challacombe, M.; Gill, P. M. W.; Johnson, B.; Chen, W.; Wong, M. W.; Gonzalez, C.; and Pople, J. A.; Gaussian, Inc., Wallingford CT, 2004
- (2) Becke, A. D. *J. Chem. Phys.* **1993**, *98*, 5648.
- (3) Lee, C.; Yang, W.; Parr, R. G. *Phys. Rev. B* **1988**, *37*, 785.
- (4) Hay, P. J.; Wadt, W. R. *J. Chem. Phys.* **1985**, *82*, 299.
- (5) (a) Hariharan, P. C.; Pople, J. A. *Theor. Chim. Acta* **1973**, *28*, 213. (b) Petersson, G. A.; Al-Laham, M. A. *J. Chem. Phys.* **1991**, *94*, 6081. (c) Petersson, G. A.; Bennett, A.; Tensfeldt, T. G.; Al-Laham, M. A.; Shirley, W. A.; Mantzaris, J. *J. Chem. Phys.* **1988**, *89*, 2193.
- (6) Portmann, S.; Lüthi, H. P.; MOLEKEL: An Interactive Molecular Graphics Tool. *CHIMIA* **2000**, *54*, 766.
- (7) Ortiz, J. C.; Bo, C. *Xaim*; Departamento de Química Física e Inorgánica, Universidad Rovira i Virgili: Tarragona, Spain, 1998.

**Table S1. Cartesian Coordinates for the Optimized Structure of the Anion in 2**

|    |            |            |            |   |           |            |           |
|----|------------|------------|------------|---|-----------|------------|-----------|
| Mo | 4.2538200  | 1.2771860  | 0.5532080  | H | 5.7061100 | 4.8882180  | 8.0477910 |
| P  | 2.3075260  | 0.9722570  | 2.0459830  | H | 5.9084900 | 3.4704330  | 7.0046450 |
| O  | 2.1200830  | 2.1185520  | -1.5722660 | C | 2.8952870 | 0.1193400  | 5.2988460 |
| O  | 4.2979380  | -1.2882900 | -1.2341780 | C | 2.4495210 | 0.1479240  | 6.7902170 |
| O  | 0.9255460  | 0.4192630  | 1.7983180  | H | 2.3507050 | -0.8817130 | 7.1557320 |
| C  | 2.9051600  | 1.7876820  | -0.7655710 | H | 1.4747830 | 0.6387540  | 6.8992550 |
| C  | 4.2397900  | -0.3476920 | -0.5390650 | H | 3.1566050 | 0.6556640  | 7.4531150 |
| C  | 6.6756250  | 1.4037150  | 0.7108610  | C | 4.2913860 | -0.5393680 | 5.2084680 |
| H  | 7.2759890  | 0.5168760  | 0.5530280  | H | 4.2594160 | -1.5553210 | 5.6261090 |
| C  | 6.2093900  | 2.2961090  | -0.3062140 | H | 5.0415040 | 0.0297430  | 5.7730390 |
| H  | 6.4325870  | 2.2333270  | -1.3631230 | H | 4.5993510 | -0.5992850 | 4.1619610 |
| C  | 5.4532620  | 3.3230660  | 0.3386070  | C | 1.8641420 | -0.7898100 | 4.5929760 |
| H  | 4.9926780  | 4.1707720  | -0.1521970 | H | 2.1885330 | -1.1012410 | 3.6022530 |
| C  | 5.4632840  | 3.0727130  | 1.7437270  | H | 0.8906690 | -0.3008040 | 4.4917090 |
| H  | 4.9712310  | 3.6625240  | 2.5046570  | H | 1.7282060 | -1.6973540 | 5.1964300 |
| C  | 6.2147850  | 1.8886860  | 1.9624030  | O | 3.5342220 | -0.0081090 | 2.2239260 |
| H  | 6.3485690  | 1.3987620  | 2.9184040  |   |           |            |           |
| C  | 2.3907580  | 2.0963330  | 3.5633840  |   |           |            |           |
| C  | 2.1889350  | 3.5063320  | 3.4488250  |   |           |            |           |
| C  | 2.8200760  | 4.3470180  | 4.3784570  |   |           |            |           |
| H  | 2.7151880  | 5.4199700  | 4.2555130  |   |           |            |           |
| C  | 3.5917860  | 3.8766040  | 5.4424460  |   |           |            |           |
| C  | 3.5871700  | 2.4987390  | 5.6445650  |   |           |            |           |
| H  | 4.0998500  | 2.0993120  | 6.5095930  |   |           |            |           |
| C  | 2.9522170  | 1.5933460  | 4.7763470  |   |           |            |           |
| C  | 1.2747560  | 4.2630180  | 2.4274580  |   |           |            |           |
| C  | 2.1207920  | 5.1976050  | 1.5301430  |   |           |            |           |
| H  | 2.8061690  | 4.6117630  | 0.9102910  |   |           |            |           |
| H  | 2.7116350  | 5.9145040  | 2.1121300  |   |           |            |           |
| H  | 1.4660770  | 5.7700820  | 0.8598060  |   |           |            |           |
| C  | 0.4012620  | 3.3923570  | 1.5041130  |   |           |            |           |
| H  | -0.3158850 | 4.0490250  | 0.9929960  |   |           |            |           |
| H  | -0.1549330 | 2.6290360  | 2.0508070  |   |           |            |           |
| H  | 0.9729150  | 2.8851470  | 0.7285110  |   |           |            |           |
| C  | 0.2711640  | 5.1214340  | 3.2497860  |   |           |            |           |
| H  | -0.3932010 | 5.6652210  | 2.5661130  |   |           |            |           |
| H  | 0.7564780  | 5.8607220  | 3.8941390  |   |           |            |           |
| H  | -0.3508710 | 4.4805340  | 3.8856000  |   |           |            |           |
| C  | 4.3393710  | 4.8635520  | 6.3581590  |   |           |            |           |
| C  | 3.3240270  | 5.7924800  | 7.0658890  |   |           |            |           |
| H  | 2.7298480  | 6.3650550  | 6.3458880  |   |           |            |           |
| H  | 3.8426490  | 6.5082390  | 7.7181000  |   |           |            |           |
| H  | 2.6287490  | 5.2106510  | 7.6822820  |   |           |            |           |
| C  | 5.3080650  | 5.7221070  | 5.5103370  |   |           |            |           |
| H  | 6.0465100  | 5.0904660  | 5.0032950  |   |           |            |           |
| H  | 5.8479310  | 6.4374980  | 6.1453720  |   |           |            |           |
| H  | 4.7766680  | 6.2920980  | 4.7411690  |   |           |            |           |
| C  | 5.1672590  | 4.1480550  | 7.4431990  |   |           |            |           |
| H  | 4.5339240  | 3.5650560  | 8.1216290  |   |           |            |           |

G (a.u.): -1682.577536

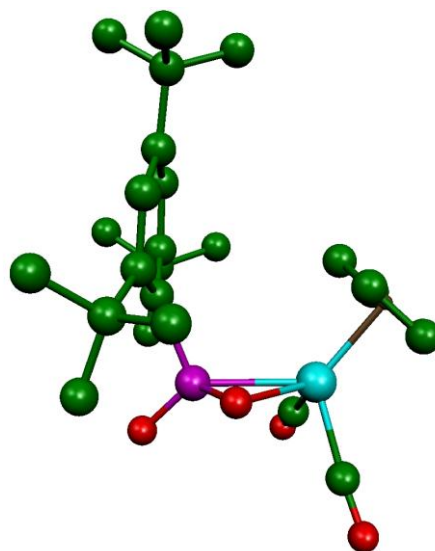

**Table S2. Cartesian Coordinates for the Optimized Structure of the Anion in 3**

|    |            |            |            |   |           |            |           |
|----|------------|------------|------------|---|-----------|------------|-----------|
| Mo | 4.3805460  | 1.3859060  | 0.3938060  | H | 4.5644200 | 3.5439580  | 8.1746490 |
| P  | 2.5346100  | 0.8623070  | 2.0521860  | H | 5.8058860 | 4.7992990  | 8.0695730 |
| S  | 4.2005200  | -0.3865840 | 2.2761920  | H | 5.9477040 | 3.3319830  | 7.0851550 |
| O  | 1.9870450  | 1.8722110  | -1.5638540 | C | 2.6839600 | 0.1184560  | 5.4926650 |
| O  | 4.6419980  | -1.1358960 | -1.4351060 | C | 1.8797670 | 0.3885490  | 6.7995070 |
| O  | 1.1778190  | 0.2436820  | 1.7805120  | H | 1.6469190 | -0.5652280 | 7.2904490 |
| C  | 2.8600670  | 1.6777620  | -0.8077380 | H | 0.9322660 | 0.8920410  | 6.5733930 |
| C  | 4.5089690  | -0.2139070 | -0.7297800 | H | 2.4238920 | 1.0077650  | 7.5190890 |
| C  | 6.7375860  | 1.8497530  | 0.2709050  | C | 3.9936020 | -0.6155890 | 5.8620310 |
| H  | 7.4295680  | 1.0522110  | 0.0332210  | H | 3.7618870 | -1.5771110 | 6.3396160 |
| C  | 6.0444060  | 2.6727350  | -0.6705100 | H | 4.6066990 | -0.0380680 | 6.5644900 |
| H  | 6.1448150  | 2.6381910  | -1.7473640 | H | 4.5887350 | -0.8080610 | 4.9654880 |
| C  | 5.2383940  | 3.5892660  | 0.0721290  | C | 1.7944390 | -0.8348620 | 4.6668350 |
| H  | 4.6174600  | 4.3665860  | -0.3530530 | H | 2.3180030 | -1.2877820 | 3.8258680 |
| C  | 5.4477440  | 3.3464640  | 1.4621030  | H | 0.9108770 | -0.3323180 | 4.2662060 |
| H  | 4.9674140  | 3.8608000  | 2.2829440  | H | 1.4608420 | -1.6504030 | 5.3226830 |
| C  | 6.3664170  | 2.2727090  | 1.5777000  |   |           |            |           |
| H  | 6.6781840  | 1.8083890  | 2.5034850  |   |           |            |           |
| C  | 2.5160960  | 1.9940720  | 3.5886680  |   |           |            |           |
| C  | 2.3363570  | 3.4061000  | 3.4406900  |   |           |            |           |
| C  | 2.9733030  | 4.2571640  | 4.3566590  |   |           |            |           |
| H  | 2.8917840  | 5.3291530  | 4.2048610  |   |           |            |           |
| C  | 3.6981870  | 3.7940990  | 5.4579850  |   |           |            |           |
| C  | 3.6037530  | 2.4295900  | 5.7211970  |   |           |            |           |
| H  | 4.0317150  | 2.0423060  | 6.6376570  |   |           |            |           |
| C  | 2.9649550  | 1.5211410  | 4.8580310  |   |           |            |           |
| C  | 1.3640990  | 4.1340700  | 2.4533270  |   |           |            |           |
| C  | 2.1099230  | 5.1453850  | 1.5541140  |   |           |            |           |
| H  | 2.7867190  | 4.6210190  | 0.8751910  |   |           |            |           |
| H  | 2.6941650  | 5.8719370  | 2.1304320  |   |           |            |           |
| H  | 1.3899610  | 5.7071190  | 0.9444260  |   |           |            |           |
| C  | 0.5151340  | 3.2297900  | 1.5411270  |   |           |            |           |
| H  | -0.2531080 | 3.8500770  | 1.0597910  |   |           |            |           |
| H  | 0.0185290  | 2.4281050  | 2.0908160  |   |           |            |           |
| H  | 1.0929750  | 2.7660810  | 0.7437310  |   |           |            |           |
| C  | 0.3427080  | 4.9077670  | 3.3369610  |   |           |            |           |
| H  | -0.3809550 | 5.4270760  | 2.6953230  |   |           |            |           |
| H  | 0.8140450  | 5.6562170  | 3.9814090  |   |           |            |           |
| H  | -0.2119720 | 4.2143620  | 3.9797010  |   |           |            |           |
| C  | 4.4661280  | 4.7789300  | 6.3579900  |   |           |            |           |
| C  | 3.4779050  | 5.7753090  | 7.0103080  |   |           |            |           |
| H  | 2.9280520  | 6.3506490  | 6.2579430  |   |           |            |           |
| H  | 4.0131820  | 6.4878310  | 7.6525260  |   |           |            |           |
| H  | 2.7423410  | 5.2457180  | 7.6270440  |   |           |            |           |
| C  | 5.4892640  | 5.5648930  | 5.5039870  |   |           |            |           |
| H  | 6.2125120  | 4.8853660  | 5.0388190  |   |           |            |           |
| H  | 6.0432350  | 6.2810710  | 6.1258300  |   |           |            |           |
| H  | 4.9996070  | 6.1264030  | 4.7015670  |   |           |            |           |
| C  | 5.2379700  | 4.0650770  | 7.4846540  |   |           |            |           |

G (a.u.): -2005.548898

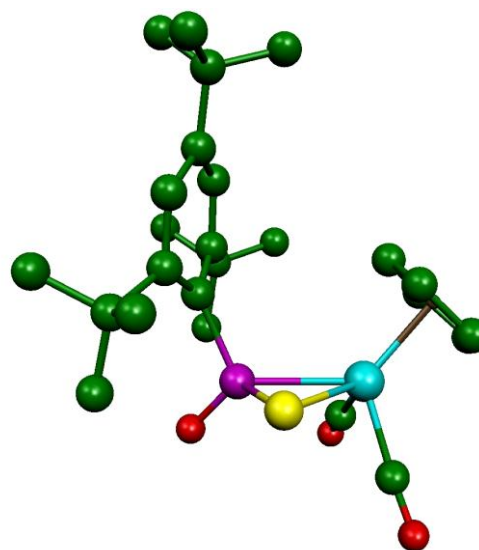

**Table S3. Cartesian Coordinates for the Optimized Structure of 5**

|    |            |            |            |   |           |            |           |
|----|------------|------------|------------|---|-----------|------------|-----------|
| Mo | 4.4812530  | 1.3902020  | 0.4825560  | H | 5.8613450 | 4.8349380  | 8.0059830 |
| P  | 2.5789710  | 0.9204840  | 2.0570960  | H | 6.0137170 | 3.3679930  | 7.0277240 |
| O  | 2.1051580  | 1.8805720  | -1.5177950 | C | 2.7125620 | 0.1141410  | 5.5350470 |
| O  | 4.8651120  | -1.0522390 | -1.4425200 | C | 1.8824300 | 0.4273240  | 6.8162000 |
| O  | 1.3895340  | 0.0453540  | 1.7598910  | H | 1.6181020 | -0.5112470 | 7.3179800 |
| C  | 2.9596890  | 1.6861570  | -0.7576860 | H | 0.9526540 | 0.9476670  | 6.5603200 |
| C  | 4.6838830  | -0.1666130 | -0.7120340 | H | 2.4274000 | 1.0460480  | 7.5344630 |
| C  | 6.7974570  | 1.8913560  | 0.3350540  | C | 4.0029950 | -0.6230800 | 5.9603760 |
| H  | 7.5223990  | 1.1203020  | 0.1106280  | H | 3.7442160 | -1.5547930 | 6.4781000 |
| C  | 6.0841300  | 2.6831050  | -0.6190440 | H | 4.6131010 | -0.0267160 | 6.6473790 |
| H  | 6.1891320  | 2.6364890  | -1.6946400 | H | 4.6223500 | -0.8748520 | 5.0949720 |
| C  | 5.2614030  | 3.5994780  | 0.1080950  | C | 1.8314700 | -0.8432070 | 4.7105460 |
| H  | 4.6256520  | 4.3579040  | -0.3282070 | H | 2.3456820 | -1.2806040 | 3.8575450 |
| C  | 5.4747780  | 3.3841880  | 1.5004410  | H | 0.9310220 | -0.3526800 | 4.3328340 |
| H  | 4.9904160  | 3.9106680  | 2.3113740  | H | 1.5201150 | -1.6725320 | 5.3568760 |
| C  | 6.4174280  | 2.3319320  | 1.6363350  | S | 4.4389490 | -0.3648490 | 2.3708320 |
| H  | 6.7720740  | 1.9192910  | 2.5720200  | C | 3.8380850 | -1.9914170 | 1.7637380 |
| C  | 2.5265580  | 1.9685530  | 3.6155830  | H | 3.8967850 | -2.6987450 | 2.5949350 |
| C  | 2.3360380  | 3.3791640  | 3.4459570  | H | 2.7991000 | -1.8774310 | 1.4387930 |
| C  | 2.9749500  | 4.2390590  | 4.3457870  | H | 4.4634840 | -2.3341660 | 0.9388000 |
| H  | 2.8651910  | 5.3085160  | 4.2004710  |   |           |            |           |
| C  | 3.7283690  | 3.7880750  | 5.4364610  |   |           |            |           |
| C  | 3.6559880  | 2.4245110  | 5.7117730  |   |           |            |           |
| H  | 4.0932330  | 2.0545780  | 6.6302570  |   |           |            |           |
| C  | 3.0079100  | 1.4983750  | 4.8744190  |   |           |            |           |
| C  | 1.3321550  | 4.0659830  | 2.4648800  |   |           |            |           |
| C  | 2.0365050  | 5.0708060  | 1.5266290  |   |           |            |           |
| H  | 2.7051950  | 4.5515730  | 0.8344240  |   |           |            |           |
| H  | 2.6220280  | 5.8155730  | 2.0764280  |   |           |            |           |
| H  | 1.2920950  | 5.6106300  | 0.9291020  |   |           |            |           |
| C  | 0.4843340  | 3.1126710  | 1.6011750  |   |           |            |           |
| H  | -0.3033300 | 3.6959730  | 1.1095720  |   |           |            |           |
| H  | 0.0003180  | 2.3310230  | 2.1923920  |   |           |            |           |
| H  | 1.0487420  | 2.6339890  | 0.8001960  |   |           |            |           |
| C  | 0.3137010  | 4.8384940  | 3.3522540  |   |           |            |           |
| H  | -0.4378230 | 5.3184900  | 2.7140430  |   |           |            |           |
| H  | 0.7831600  | 5.6195850  | 3.9566990  |   |           |            |           |
| H  | -0.2064600 | 4.1545130  | 4.0320290  |   |           |            |           |
| C  | 4.4917570  | 4.7878020  | 6.3226790  |   |           |            |           |
| C  | 3.4906300  | 5.7625740  | 6.9885210  |   |           |            |           |
| H  | 2.9226120  | 6.3344030  | 6.2470960  |   |           |            |           |
| H  | 4.0234230  | 6.4795390  | 7.6251840  |   |           |            |           |
| H  | 2.7730220  | 5.2199110  | 7.6142850  |   |           |            |           |
| C  | 5.4825690  | 5.5928840  | 5.4481600  |   |           |            |           |
| H  | 6.2175690  | 4.9307280  | 4.9754180  |   |           |            |           |
| H  | 6.0285430  | 6.3200120  | 6.0614270  |   |           |            |           |
| H  | 4.9700630  | 6.1468960  | 4.6545170  |   |           |            |           |
| C  | 5.2961590  | 4.0890730  | 7.4358090  |   |           |            |           |
| H  | 4.6459680  | 3.5619820  | 8.1431900  |   |           |            |           |

G (a.u.): -2045.335898

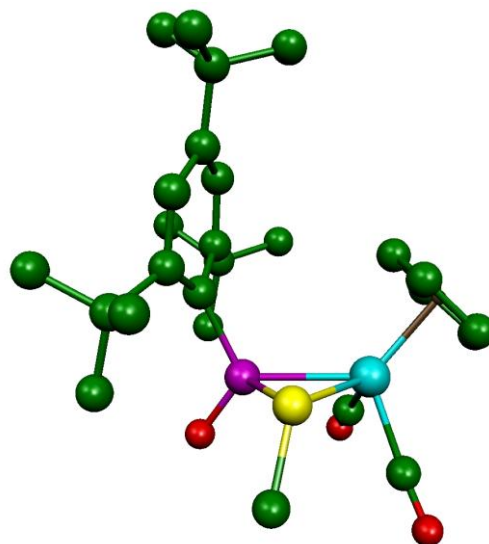

**Table S4. Cartesian Coordinates for the Optimized Structure of 6**

|    |            |            |            |   |            |            |            |
|----|------------|------------|------------|---|------------|------------|------------|
| Mo | 4.2743210  | 1.4018240  | 0.3207310  | H | 5.7404180  | 4.7914290  | 8.1451760  |
| P  | 2.6109950  | 1.0083230  | 2.1151670  | H | 5.8822860  | 3.3249330  | 7.1652500  |
| O  | 1.9274510  | 2.1085850  | -1.6413320 | C | 2.6587790  | 0.1270310  | 5.5291730  |
| O  | 4.3036850  | -1.1528650 | -1.5020840 | C | 1.8840210  | 0.3679260  | 6.8599080  |
| O  | 1.1308440  | 0.3123060  | 1.9221960  | H | 1.6597970  | -0.5979970 | 7.3275370  |
| C  | 2.7814730  | 1.8401150  | -0.8955310 | H | 0.9339360  | 0.8809370  | 6.6715980  |
| C  | 4.2623310  | -0.2189050 | -0.8140410 | H | 2.4476000  | 0.9607390  | 7.5850450  |
| C  | 6.6117680  | 1.7111520  | 0.0422590  | C | 3.9846870  | -0.5991620 | 5.8537720  |
| H  | 7.2497450  | 0.8901680  | -0.2568160 | H | 3.7731410  | -1.5601580 | 6.3383500  |
| C  | 5.9129680  | 2.5992360  | -0.8331890 | H | 4.6144800  | -0.0177890 | 6.5360720  |
| H  | 5.9447940  | 2.5878980  | -1.9143330 | H | 4.5599490  | -0.7941480 | 4.9447470  |
| C  | 5.2137990  | 3.5453980  | -0.0193260 | C | 1.7531900  | -0.8166000 | 4.7117890  |
| H  | 4.6215580  | 4.3730050  | -0.3852180 | H | 2.2438010  | -1.2329730 | 3.8326720  |
| C  | 5.5003980  | 3.2569870  | 1.3487890  | H | 0.8339630  | -0.3197680 | 4.3898780  |
| H  | 5.1150830  | 3.7879460  | 2.2089410  | H | 1.4724480  | -1.6631750 | 5.3492860  |
| C  | 6.3594220  | 2.1300150  | 1.3816640  | C | 0.8860750  | -0.5899650 | 0.8347520  |
| H  | 6.7208500  | 1.6374280  | 2.2743910  | H | 1.6111830  | -1.4102390 | 0.8373620  |
| C  | 2.4527660  | 2.0364430  | 3.6499510  | H | -0.1193510 | -0.9853450 | 0.9946020  |
| C  | 2.2971590  | 3.4540990  | 3.4879670  | H | 0.9273480  | -0.0652000 | -0.1246470 |
| C  | 2.9370930  | 4.2890040  | 4.4098760  | S | 4.1078190  | -0.3878880 | 2.2224370  |
| H  | 2.8655320  | 5.3612910  | 4.2655210  |   |            |            |            |
| C  | 3.6499830  | 3.8126230  | 5.5149300  |   |            |            |            |
| C  | 3.5447000  | 2.4483740  | 5.7742430  |   |            |            |            |
| H  | 3.9631960  | 2.0608150  | 6.6934060  |   |            |            |            |
| C  | 2.9113280  | 1.5396520  | 4.9097510  |   |            |            |            |
| C  | 1.3512320  | 4.1882810  | 2.4835500  |   |            |            |            |
| C  | 2.1343450  | 5.1411560  | 1.5539330  |   |            |            |            |
| H  | 2.7848570  | 4.5751680  | 0.8821960  |   |            |            |            |
| H  | 2.7518210  | 5.8526650  | 2.1126770  |   |            |            |            |
| H  | 1.4370200  | 5.7202630  | 0.9365260  |   |            |            |            |
| C  | 0.4672260  | 3.2782710  | 1.6107420  |   |            |            |            |
| H  | -0.2654650 | 3.9032970  | 1.0868860  |   |            |            |            |
| H  | -0.0815580 | 2.5450240  | 2.2069680  |   |            |            |            |
| H  | 1.0268930  | 2.7488680  | 0.8400440  |   |            |            |            |
| C  | 0.3572510  | 5.0257800  | 3.3397140  |   |            |            |            |
| H  | -0.3567940 | 5.5309400  | 2.6784340  |   |            |            |            |
| H  | 0.8513960  | 5.7947290  | 3.9395610  |   |            |            |            |
| H  | -0.2095380 | 4.3810840  | 4.0207290  |   |            |            |            |
| C  | 4.4187020  | 4.7869270  | 6.4239540  |   |            |            |            |
| C  | 3.4296920  | 5.7901050  | 7.0653480  |   |            |            |            |
| H  | 2.8982740  | 6.3798000  | 6.3108800  |   |            |            |            |
| H  | 3.9673140  | 6.4899120  | 7.7167610  |   |            |            |            |
| H  | 2.6804770  | 5.2685310  | 7.6717520  |   |            |            |            |
| C  | 5.4553120  | 5.5624750  | 5.5759910  |   |            |            |            |
| H  | 6.1815340  | 4.8784980  | 5.1214570  |   |            |            |            |
| H  | 6.0064580  | 6.2724140  | 6.2045270  |   |            |            |            |
| H  | 4.9800590  | 6.1317330  | 4.7701300  |   |            |            |            |
| C  | 5.1723100  | 4.0627230  | 7.5560800  |   |            |            |            |
| H  | 4.4884670  | 3.5503690  | 8.2423120  |   |            |            |            |

G (a.u.): -2045.343917

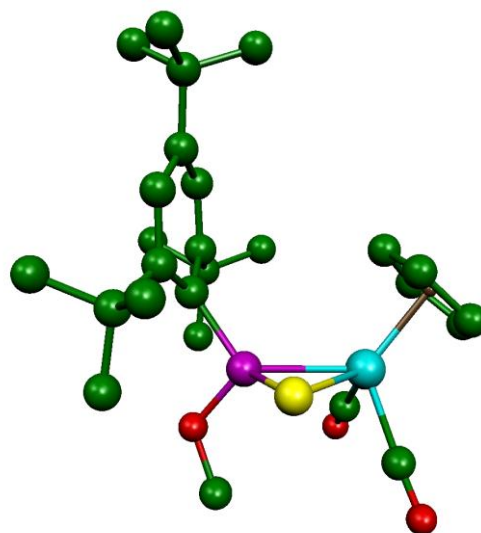

**Table S5. Cartesian Coordinates for the Optimized Structure of 8-S**

|    |            |            |            |   |           |            |           |
|----|------------|------------|------------|---|-----------|------------|-----------|
| Mo | 4.4249860  | 1.3757470  | 0.4452010  | H | 5.8418940 | 4.7509240  | 8.0712240 |
| P  | 2.5294730  | 0.9717370  | 2.0369530  | H | 5.9771050 | 3.2913420  | 7.0796170 |
| O  | 2.0321400  | 1.7357790  | -1.5656850 | C | 2.6487640 | 0.1194900  | 5.5020360 |
| O  | 4.7672960  | -1.2092260 | -1.2963700 | C | 1.7651590 | 0.4377140  | 6.7459350 |
| O  | 1.3310010  | 0.1078230  | 1.7728320  | H | 1.4879950 | -0.4978820 | 7.2462520 |
| C  | 2.8935420  | 1.5903020  | -0.8038070 | H | 0.8425100 | 0.9479760  | 6.4474030 |
| C  | 4.6077520  | -0.2642490 | -0.6417130 | H | 2.2768770 | 1.0689060  | 7.4779440 |
| C  | 6.7285510  | 1.8928310  | 0.1990640  | C | 3.9212790 | -0.6156810 | 5.9832080 |
| H  | 7.4550560  | 1.1217350  | -0.0199920 | H | 3.6390320 | -1.5487760 | 6.4855340 |
| C  | 5.9718110  | 2.6369460  | -0.7589350 | H | 4.5014070 | -0.0238220 | 6.6990730 |
| H  | 6.0410120  | 2.5503580  | -1.8349200 | H | 4.5772520 | -0.8683210 | 5.1455540 |
| C  | 5.1607050  | 3.5707020  | -0.0384430 | C | 1.8092240 | -0.8514010 | 4.6491800 |
| H  | 4.5013940  | 4.3044220  | -0.4820600 | H | 2.3649130 | -1.2949230 | 3.8236870 |
| C  | 5.4275090  | 3.4142390  | 1.3531750  | H | 0.9204850 | -0.3748710 | 4.2299120 |
| H  | 4.9678060  | 3.9669760  | 2.1610140  | H | 1.4801810 | -1.6767210 | 5.2917450 |
| C  | 6.3894710  | 2.3810000  | 1.4948550  | S | 4.4605200 | -0.3000920 | 2.4151220 |
| H  | 6.7831580  | 2.0094280  | 2.4323010  | H | 3.9929310 | -1.4365710 | 1.8542900 |
| C  | 2.5090340  | 2.0066810  | 3.6025910  |   |           |            |           |
| C  | 2.3505970  | 3.4229750  | 3.4472480  |   |           |            |           |
| C  | 2.9953110  | 4.2582810  | 4.3656230  |   |           |            |           |
| H  | 2.9063590  | 5.3315530  | 4.2351910  |   |           |            |           |
| C  | 3.7245740  | 3.7781100  | 5.4598470  |   |           |            |           |
| C  | 3.6232180  | 2.4127920  | 5.7158640  |   |           |            |           |
| H  | 4.0416730  | 2.0239940  | 6.6350350  |   |           |            |           |
| C  | 2.9701040  | 1.5082030  | 4.8585520  |   |           |            |           |
| C  | 1.3657770  | 4.1438160  | 2.4708490  |   |           |            |           |
| C  | 2.0847940  | 5.1873010  | 1.5874160  |   |           |            |           |
| H  | 2.7725970  | 4.6982800  | 0.8919190  |   |           |            |           |
| H  | 2.6526750  | 5.9160690  | 2.1751210  |   |           |            |           |
| H  | 1.3503490  | 5.7439020  | 0.9930610  |   |           |            |           |
| C  | 0.5409220  | 3.2268590  | 1.5484300  |   |           |            |           |
| H  | -0.2321070 | 3.8302430  | 1.0578300  |   |           |            |           |
| H  | 0.0379510  | 2.4236320  | 2.0928620  |   |           |            |           |
| H  | 1.1299060  | 2.7822050  | 0.7445030  |   |           |            |           |
| C  | 0.3276570  | 4.8766870  | 3.3686720  |   |           |            |           |
| H  | -0.4105200 | 5.3855290  | 2.7370930  |   |           |            |           |
| H  | 0.7860600  | 5.6283580  | 4.0174270  |   |           |            |           |
| H  | -0.2061860 | 4.1632000  | 4.0061060  |   |           |            |           |
| C  | 4.4967600  | 4.7511930  | 6.3678120  |   |           |            |           |
| C  | 3.5084060  | 5.7417040  | 7.0294850  |   |           |            |           |
| H  | 2.9641680  | 6.3341100  | 6.2863580  |   |           |            |           |
| H  | 4.0482070  | 6.4398110  | 7.6809780  |   |           |            |           |
| H  | 2.7698750  | 5.2093010  | 7.6394990  |   |           |            |           |
| C  | 5.5175270  | 5.5421430  | 5.5150370  |   |           |            |           |
| H  | 6.2442780  | 4.8679870  | 5.0465340  |   |           |            |           |
| H  | 6.0705050  | 6.2514110  | 6.1427430  |   |           |            |           |
| H  | 5.0285060  | 6.1142620  | 4.7194110  |   |           |            |           |
| C  | 5.2692740  | 4.0234860  | 7.4848940  |   |           |            |           |
| H  | 4.5974060  | 3.5032830  | 8.1769400  |   |           |            |           |

G (a.u.): -2006.046941

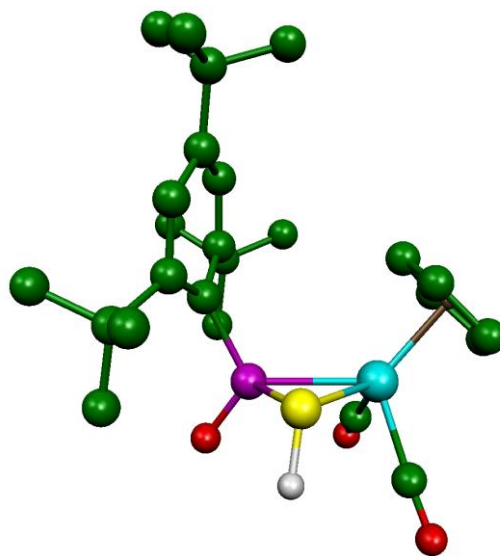



**Table S6. Cartesian Coordinates for the Optimized Structure of 8-O**

|    |            |            |            |   |           |            |           |
|----|------------|------------|------------|---|-----------|------------|-----------|
| Mo | 4.3761560  | 1.3500440  | 0.3097850  | C | 5.4395190 | 5.5707960  | 5.6719150 |
| P  | 2.7578480  | 0.9964210  | 2.1415610  | H | 6.1817360 | 4.8876970  | 5.2427240 |
| O  | 1.9244000  | 1.7515480  | -1.6068790 | H | 5.9684130 | 6.2861930  | 6.3132390 |
| O  | 4.5375640  | -1.3138470 | -1.3478510 | H | 4.9859530 | 6.1337050  | 4.8492690 |
| O  | 1.3084800  | 0.2466300  | 1.8681310  | C | 5.1034370 | 4.0789060  | 7.6499030 |
| C  | 2.8244700  | 1.6011580  | -0.8819120 | H | 4.4015110 | 3.5650910  | 8.3165140 |
| C  | 4.4482020  | -0.3425790 | -0.7201420 | H | 5.6488310 | 4.8130710  | 8.2534810 |
| C  | 6.6860220  | 1.7627010  | -0.0655260 | H | 5.8294390 | 3.3439140  | 7.2841190 |
| H  | 7.3578340  | 0.9614080  | -0.3432920 | C | 2.6965750 | 0.1149810  | 5.5442360 |
| C  | 5.9098750  | 2.5621660  | -0.9621980 | C | 1.8662800 | 0.3455140  | 6.8428560 |
| H  | 5.9093330  | 2.4946060  | -2.0417130 | H | 1.6366910 | -0.6233230 | 7.3017320 |
| C  | 5.1871120  | 3.5137990  | -0.1760170 | H | 0.9175630 | 0.8455030  | 6.6166070 |
| H  | 4.5389370  | 4.2874820  | -0.5644670 | H | 2.3930480 | 0.9462630  | 7.5890010 |
| C  | 5.5329360  | 3.3142660  | 1.1946870  | C | 4.0175160 | -0.5942350 | 5.9220780 |
| H  | 5.1492340  | 3.8708590  | 2.0392950  | H | 3.7983430 | -1.5585060 | 6.3964510 |
| C  | 6.4547100  | 2.2386030  | 1.2573400  | H | 4.6116310 | -0.0061480 | 6.6301070 |
| H  | 6.8712500  | 1.8156110  | 2.1617160  | H | 4.6326420 | -0.7811540 | 5.0377870 |
| C  | 2.5277870  | 2.0234600  | 3.6640490  | C | 1.8377600 | -0.8387100 | 4.6890520 |
| C  | 2.3582210  | 3.4390270  | 3.4979400  | H | 2.3665260 | -1.2481050 | 3.8289500 |
| C  | 2.9616270  | 4.2809180  | 4.4379260  | H | 0.9243020 | -0.3552030 | 4.3316440 |
| H  | 2.8805100  | 5.3523560  | 4.2919910  | H | 1.5421410 | -1.6900210 | 5.3133360 |
| C  | 3.6464920  | 3.8125880  | 5.5638250  | S | 4.3002070 | -0.3365150 | 2.3128000 |
| C  | 3.5469200  | 2.4473990  | 5.8219080  | H | 1.3374520 | -0.1812010 | 0.9936390 |
| H  | 3.9388840  | 2.0648180  | 6.7547790  |   |           |            |           |
| C  | 2.9539390  | 1.5317320  | 4.9374170  |   |           |            |           |
| C  | 1.4232300  | 4.1593260  | 2.4745630  |   |           |            |           |
| C  | 2.2045240  | 5.1478980  | 1.5816620  |   |           |            |           |
| H  | 2.8960350  | 4.6116780  | 0.9267130  |   |           |            |           |
| H  | 2.7786580  | 5.8742680  | 2.1666060  |   |           |            |           |
| H  | 1.5090760  | 5.7098790  | 0.9466280  |   |           |            |           |
| C  | 0.5938790  | 3.2364940  | 1.5633750  |   |           |            |           |
| H  | -0.1449410 | 3.8453830  | 1.0292240  |   |           |            |           |
| H  | 0.0527350  | 2.4750090  | 2.1306440  |   |           |            |           |
| H  | 1.1929330  | 2.7399170  | 0.8006850  |   |           |            |           |
| C  | 0.3818430  | 4.9553490  | 3.3137650  |   |           |            |           |
| H  | -0.3246420 | 5.4544590  | 2.6398380  |   |           |            |           |
| H  | 0.8385280  | 5.7244280  | 3.9425730  |   |           |            |           |
| H  | -0.1884490 | 4.2837510  | 3.9651350  |   |           |            |           |
| C  | 4.3812290  | 4.7946070  | 6.4921940  |   |           |            |           |
| C  | 3.3686460  | 5.7959000  | 7.0986840  |   |           |            |           |
| H  | 2.8578220  | 6.3802760  | 6.3260650  |   |           |            |           |
| H  | 3.8832230  | 6.5008110  | 7.7630400  |   |           |            |           |
| H  | 2.6036800  | 5.2736230  | 7.6844600  |   |           |            |           |

G (a.u.): -2006.066493

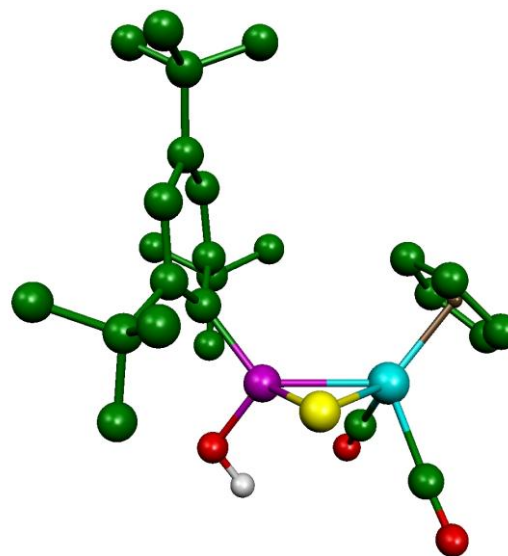



**Table S7.** Relative energies of DFT-computed isomers.

|                              | <b>5</b>     | <b>6</b>     | <b>8-S</b>   | <b>8-O</b>   |
|------------------------------|--------------|--------------|--------------|--------------|
| G <sub>gas</sub> (a.u.)      | -2045.335898 | -2045.343917 | -2006.046941 | -2006.066493 |
| ΔG <sub>gas</sub> (Kcal/mol) | 5.03         | 0.00         | 12.27        | 0.00         |

**Table S8.** Topological properties of the electron density at some bond critical points in the anion of **2**.<sup>a</sup>

| Bond | $\rho$ | $\nabla^2(\rho)$ |
|------|--------|------------------|
| Mo–P | 0.488  | 2.238            |
| Mo–O | 0.448  | 7.495            |
| P–O  | 1.240  | -17.624          |
| P=O  | 1.428  | 35.292           |

<sup>a</sup> Values of the electron density [ $\rho$ ] at the bond critical points are given in eÅ<sup>-3</sup>; values of the Laplacian of the electron density [ $\nabla^2(\rho)$ ] at these points are given in eÅ<sup>-5</sup>.

**Table S9.** Topological properties of the electron density at some bond critical points in the anion of **3**.<sup>a</sup>

| Bond | $\rho$ | $\nabla^2(\rho)$ |
|------|--------|------------------|
| Mo–P | 0.463  | 2.368            |
| Mo–S | 0.381  | 2.662            |
| P–S  | 0.901  | -4.496           |
| P=O  | 1.404  | 33.996           |

<sup>a</sup> Values of the electron density [ $\rho$ ] at the bond critical points are given in eÅ<sup>-3</sup>; values of the Laplacian of the electron density [ $\nabla^2(\rho)$ ] at these points are given in eÅ<sup>-5</sup>.

**Table S10:** Selected molecular orbitals of the anions in compounds **2** and **3**.

| MO          | 2                                                                                   | 3                                                                                    | OM          |
|-------------|-------------------------------------------------------------------------------------|--------------------------------------------------------------------------------------|-------------|
| Energy (eV) |                                                                                     |                                                                                      | Energy (eV) |
| LUMO (124)  | 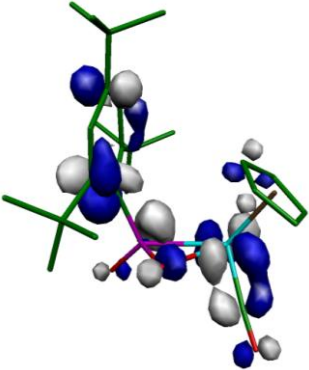   |    | LUMO (128)  |
| 1.74        |                                                                                     |                                                                                      | 1.91        |
| HOMO (123)  |   |   | HOMO (127)  |
| -1.65       |                                                                                     |                                                                                      | -1.48       |
| MO 122      |  |  | MO 126      |
| -1.93       |                                                                                     |                                                                                      | -2.02       |
| MO 121      |  |  | MO 125      |
| -2.24       |                                                                                     |                                                                                      | -2.29       |

MO  
120  
-2.82

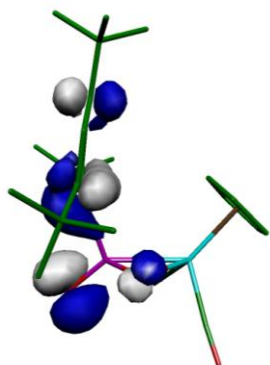

MO  
118  
-3.56

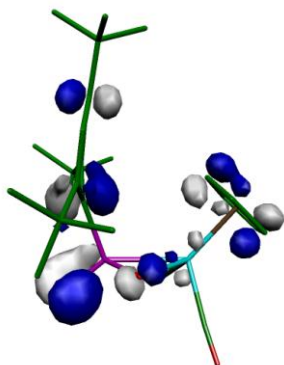

MO  
117  
-3.61

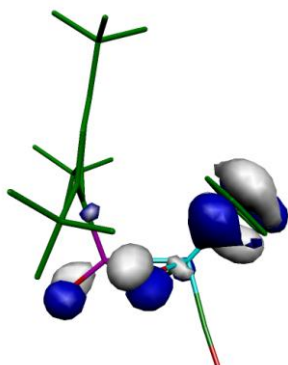

MO  
115  
-4.15

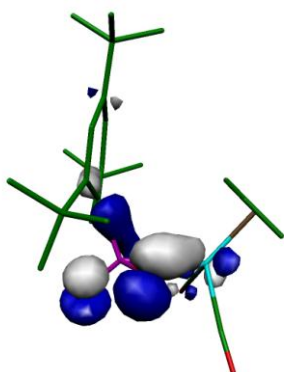

MO  
124  
-2.71

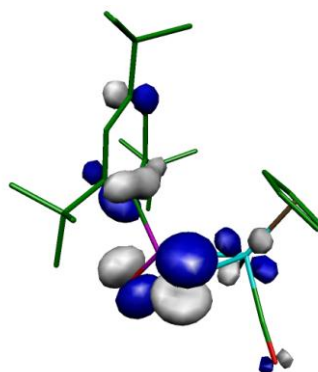

MO  
123  
-3.23

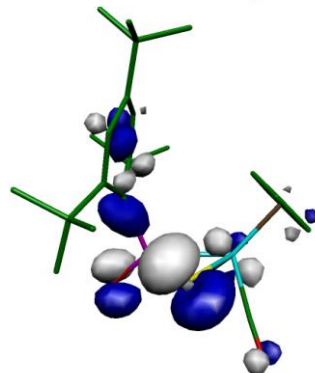

MO  
122  
-3.48

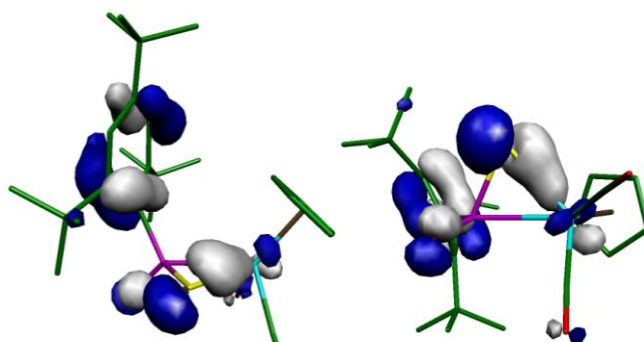

MO  
120  
-3.86

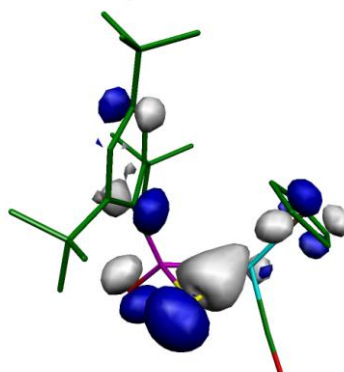

MO  
114  
-4.27

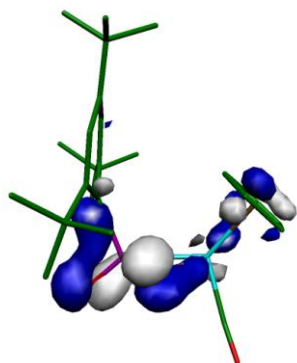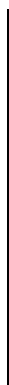

MO  
117  
-4.98

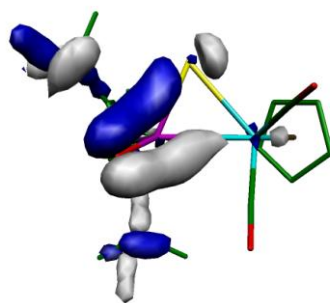

Supplement: c4dt01942c1.pdf [file c4dt01942c1.pdf]
